# Supplementary figures and images for: Kinetics and mechanism of thermal decomposition of kynurenines and biomolecular conjugates: Ramifications for the modification of mammalian eye lens proteins
Source: Royal Society of Chemistry journal article supplement (doi:10.1039/b903196k), 2009-01-01

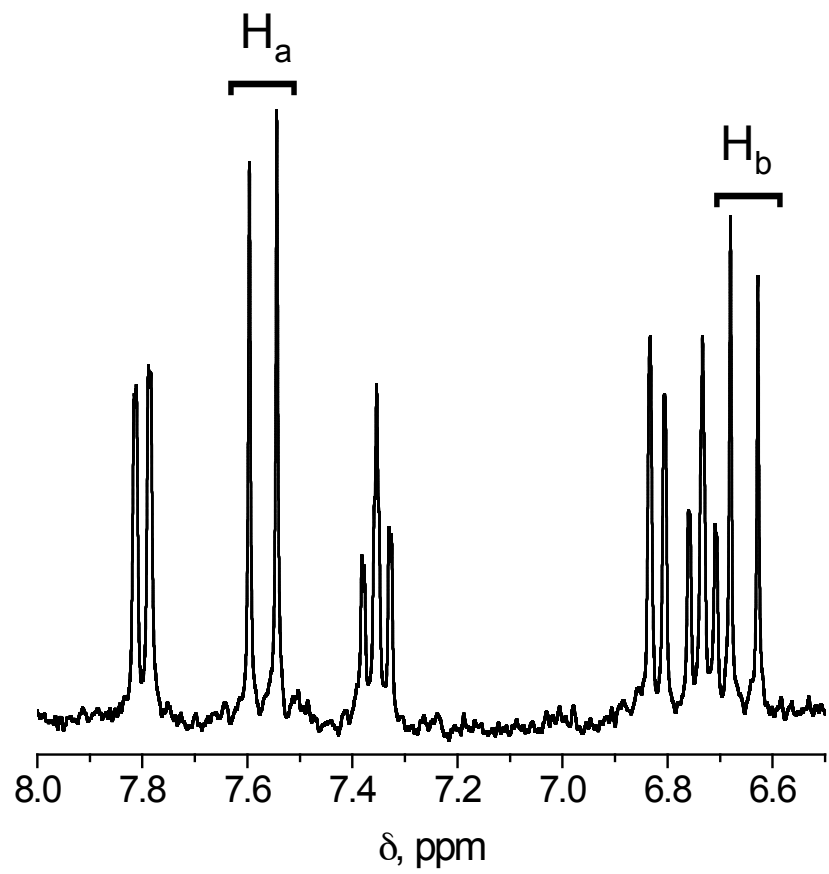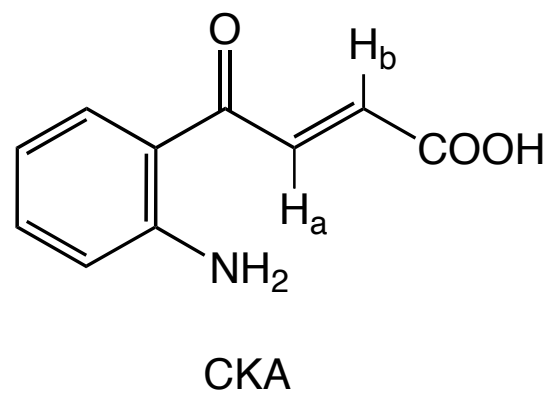

Supplement: b903196k.pdf [file b903196k.pdf]
